# Supplementary material for: Novel cyclam multicomponent crystal forms: synthesis, characterization and antimicrobial activity
Source: Royal Society of Chemistry journal article supplement (doi:10.1039/d3ce00354j), 2023-01-01
Supplement: d3ce00354j1.pdf [file d3ce00354j1.pdf]

## SUPPLEMENTARY MATERIAL

### Novel Cyclam Multicomponent Crystal Forms: Synthesis, Characterization and Antimicrobial Activity

*Rajaa Saied,<sup>1</sup> Paula C. Alves,<sup>1,2</sup> Patrícia Rijo,<sup>3,4</sup> Vânia André,<sup>1,2\*</sup> Luis G. Alves<sup>1,2\*</sup>*

<sup>1</sup> Centro de Química Estrutural, Institute of Molecular Sciences, Instituto Superior Técnico, Universidade de Lisboa, Av. Rovisco Pais 1, 1049-001 Lisboa, Portugal;

<sup>2</sup>Associação do Instituto Superior Técnico para a Investigação e Desenvolvimento, Avenida António José de Almeida, n.º 12, 1000-043 Lisboa, Portugal; <sup>3</sup> Universidade Lusófona's Research Center for Biosciences and Health Technologies (CBIOS), Campo Grande 376, 1749-024 Lisboa, Portugal; <sup>4</sup> Research Institute for Medicines (iMed. ULisboa), Faculty of Pharmacy, Universidade de Lisboa (UL), Av. Prof. Gama Pinto, 1649-003 Lisboa, Portugal

# 1) *Synthesis and characterization data for compounds 3-6*

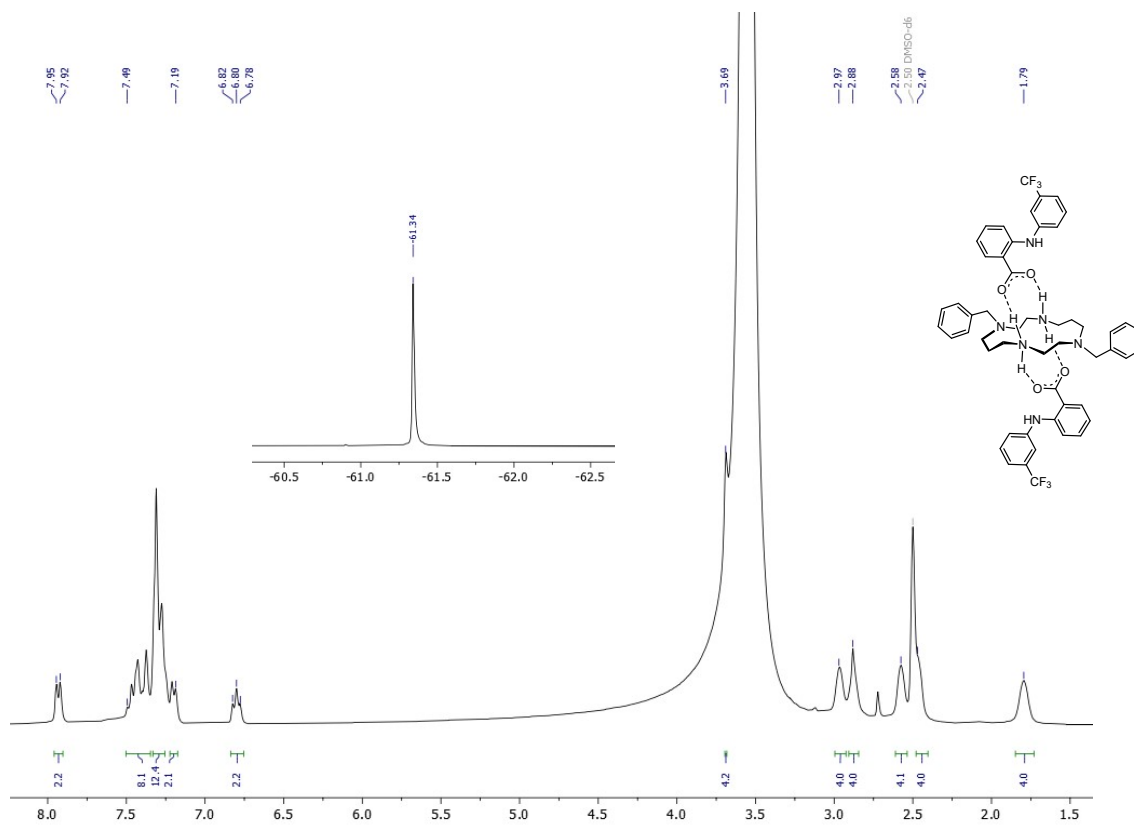

**Figure S1A:**  $^1\text{H}$  and  $^{19}\text{F}$  NMR spectra of **3** in  $\text{D}_2\text{O}/(\text{CD}_3)_2\text{SO}$ .

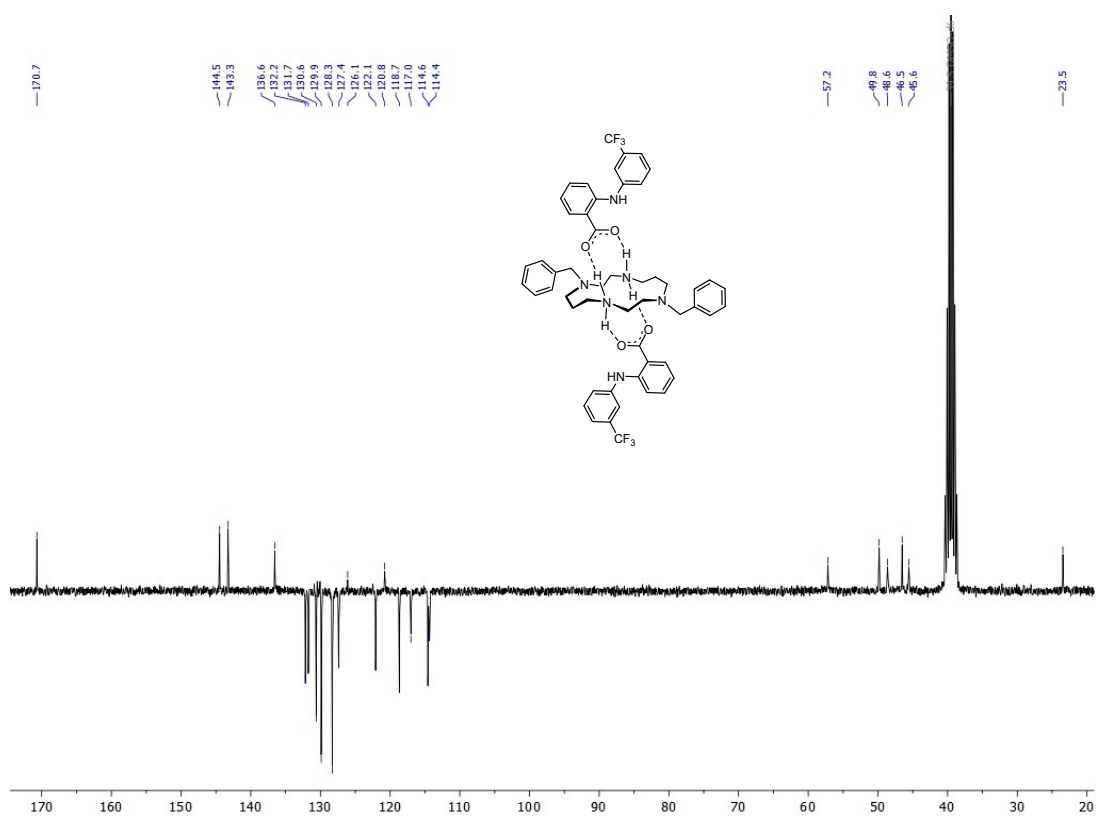

**Figure S1B:**  $^{13}\text{C}\{^1\text{H}\}$  NMR spectrum of **3** in  $\text{D}_2\text{O}/(\text{CD}_3)_2\text{SO}$ .

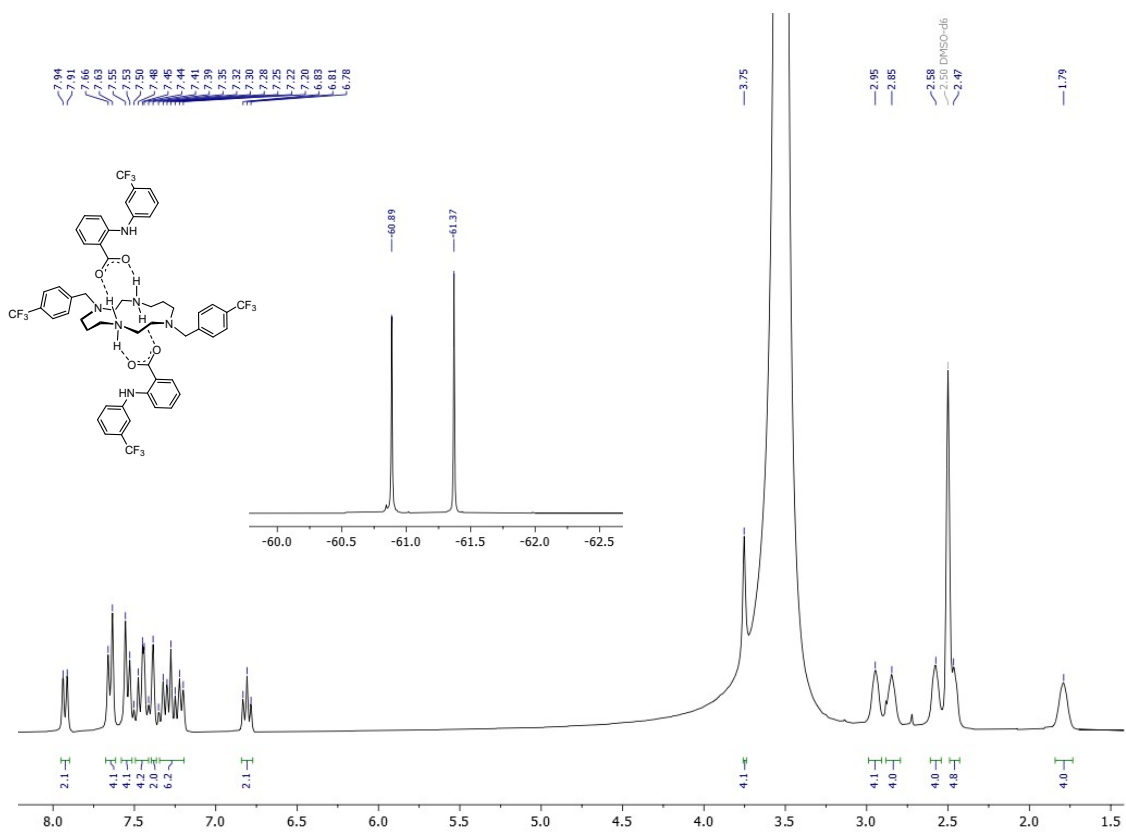

**Figure S2A:** <sup>1</sup>H and <sup>19</sup>F NMR spectra of 4 in D<sub>2</sub>O/(CD<sub>3</sub>)<sub>2</sub>SO.

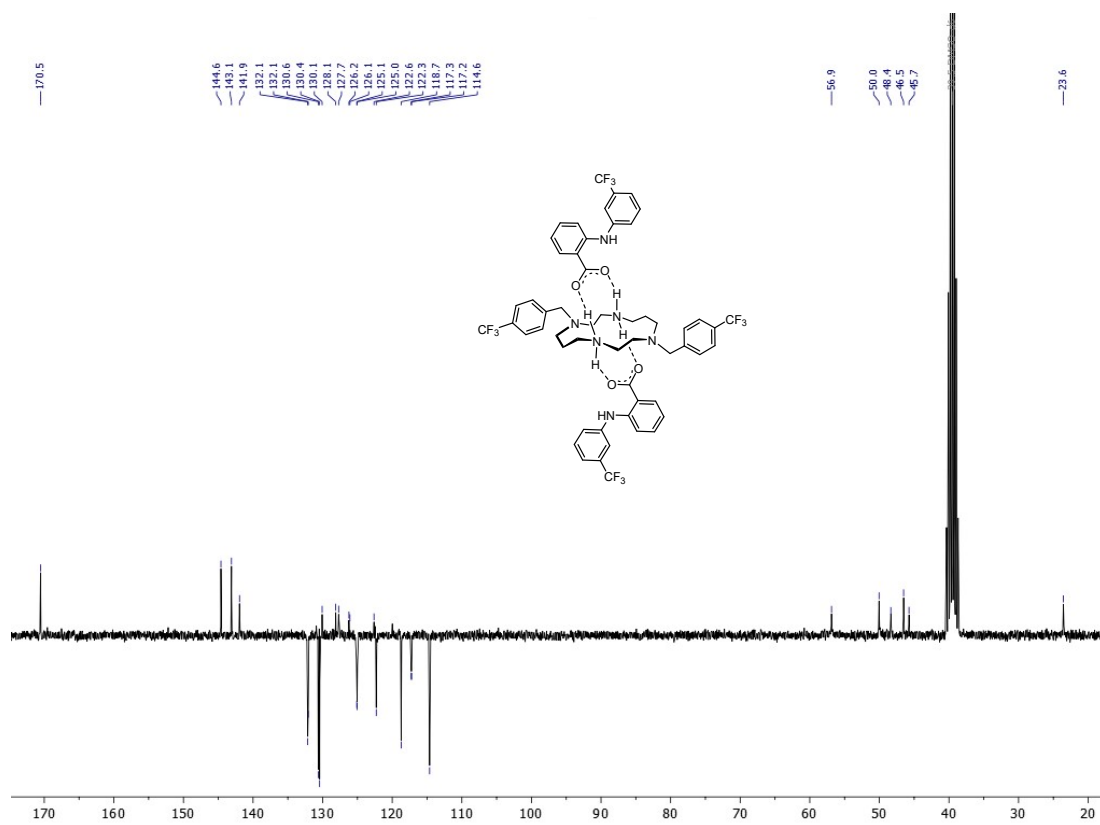

**Figure S2B:** <sup>13</sup>C{<sup>1</sup>H} NMR spectrum of 4 in D<sub>2</sub>O/(CD<sub>3</sub>)<sub>2</sub>SO.

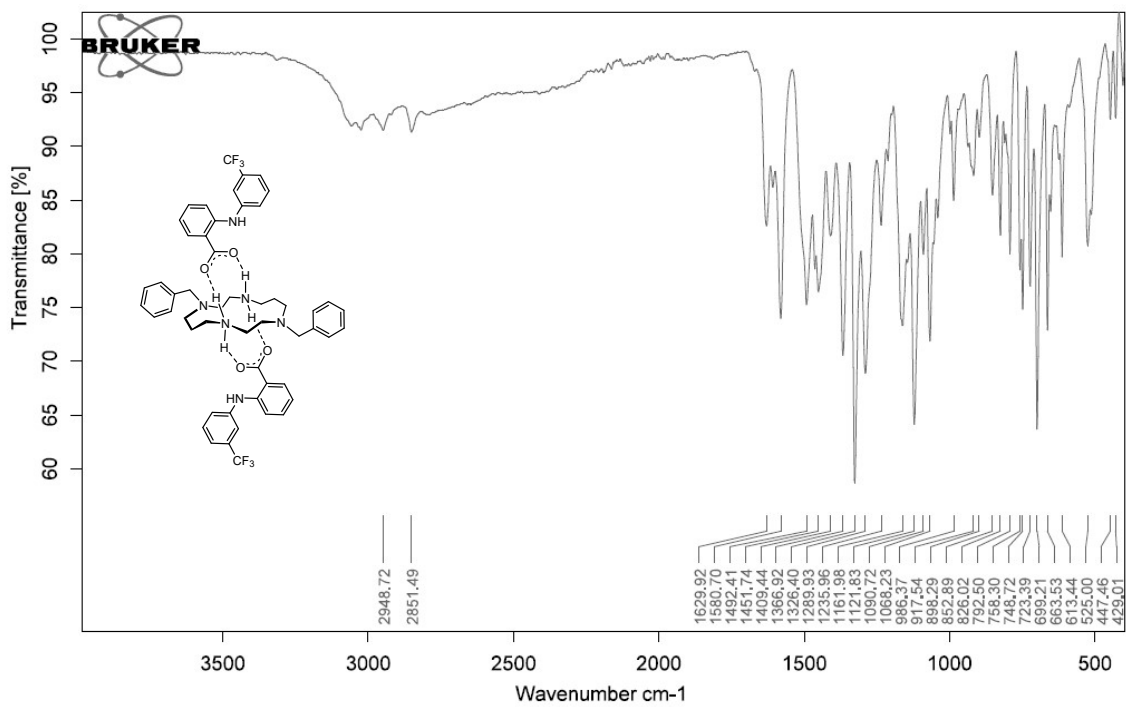

Figure S3: FT-IR spectra of 3.

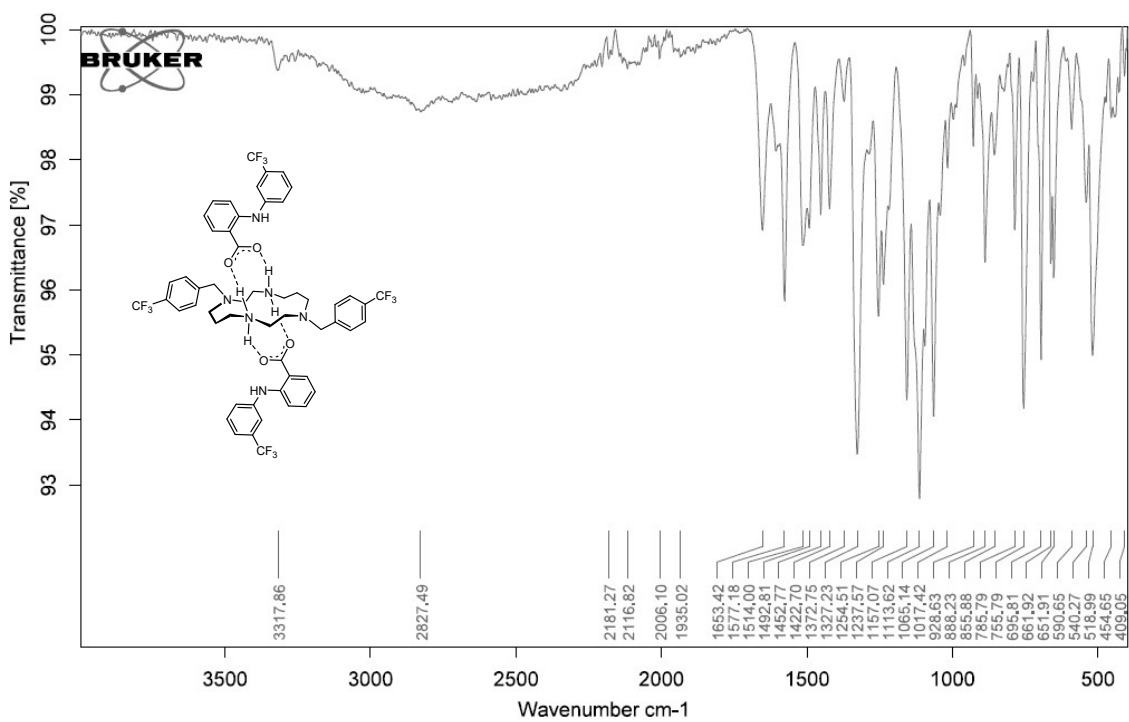

Figure S4: FT-IR spectra of 4.

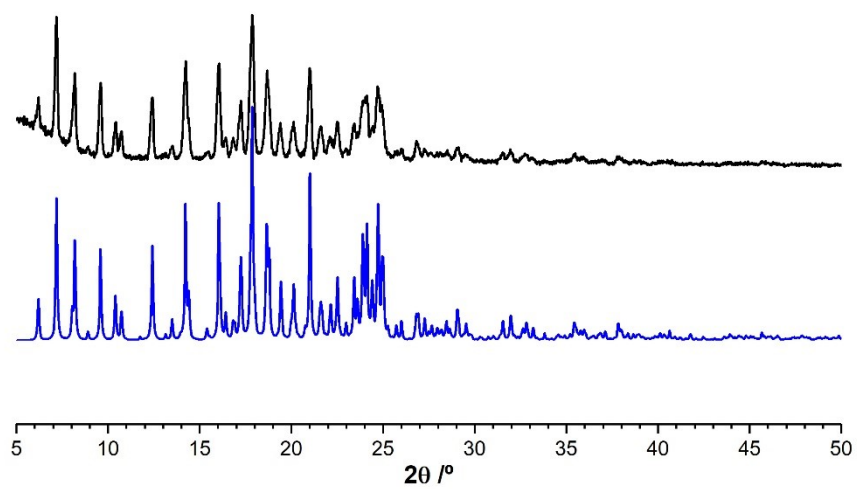

**Figure S5:** Experimental (black) and theoretical (blue) PXR D patterns of 3.

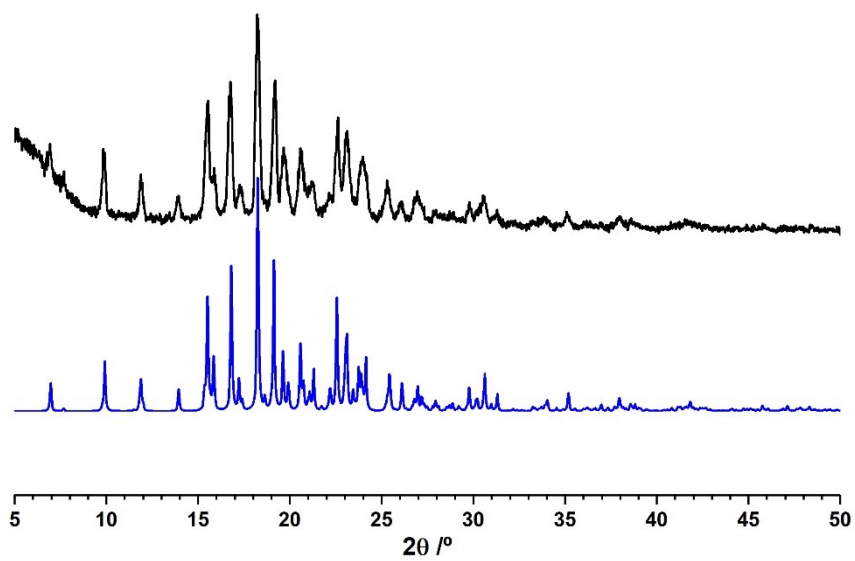

**Figure S6:** Experimental (black) and theoretical (blue) PXR D patterns of 4.

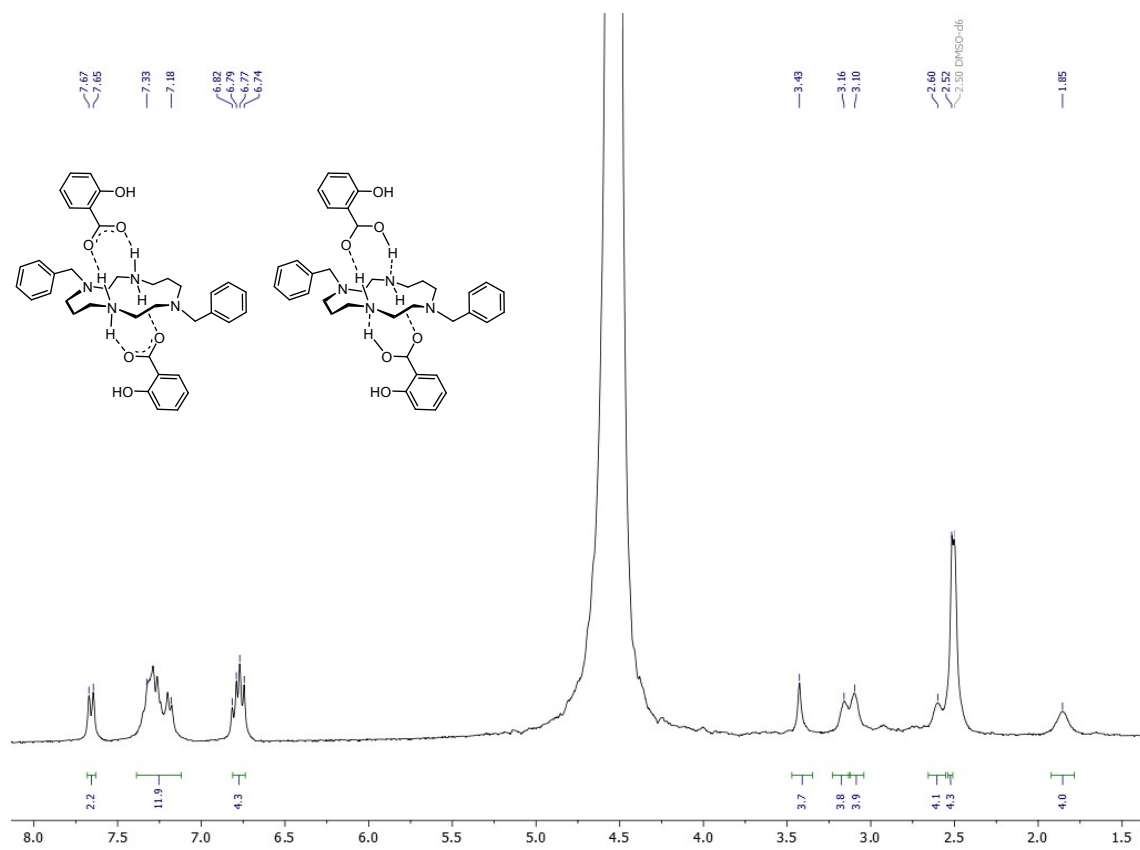

Figure S7A:  $^1\text{H}$  and  $^{19}\text{F}$  NMR spectra of 5 in  $\text{D}_2\text{O}/(\text{CD}_3)_2\text{SO}$ .

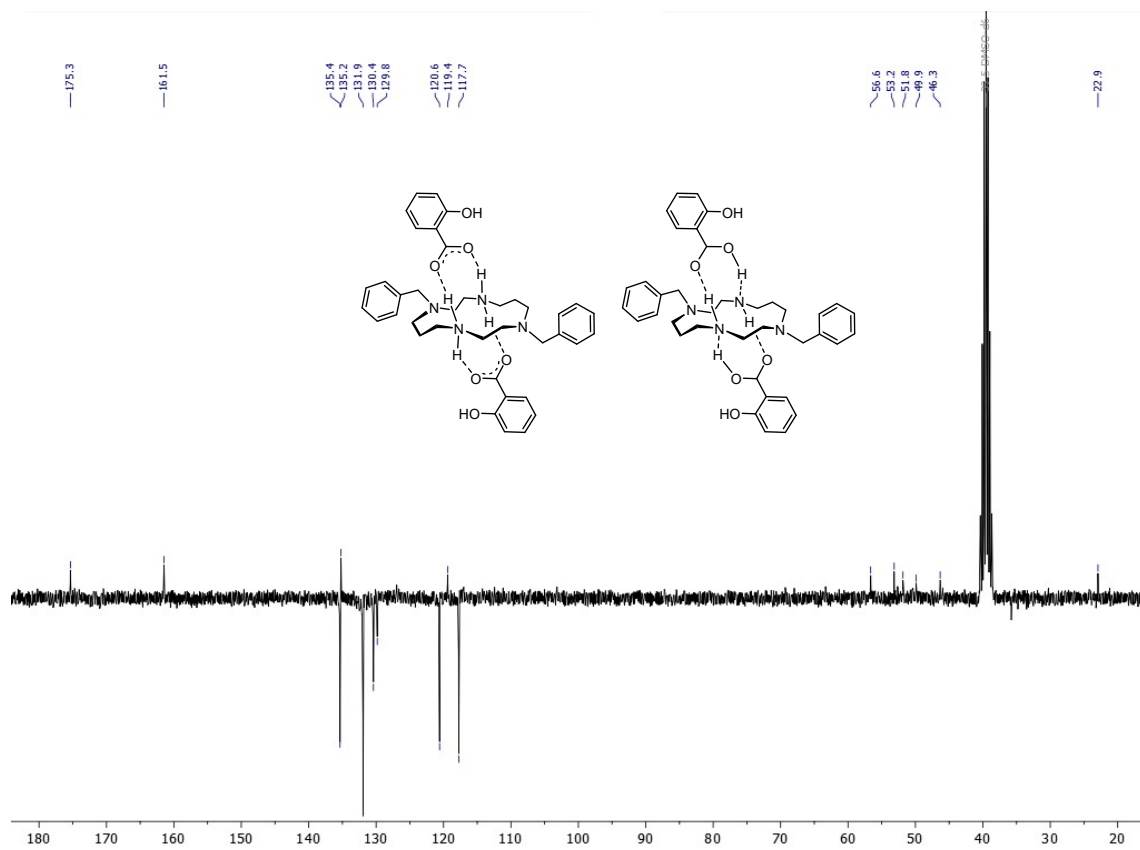

Figure S7B:  $^{13}\text{C}\{^1\text{H}\}$  NMR spectrum of 5 in  $\text{D}_2\text{O}/(\text{CD}_3)_2\text{SO}$ .

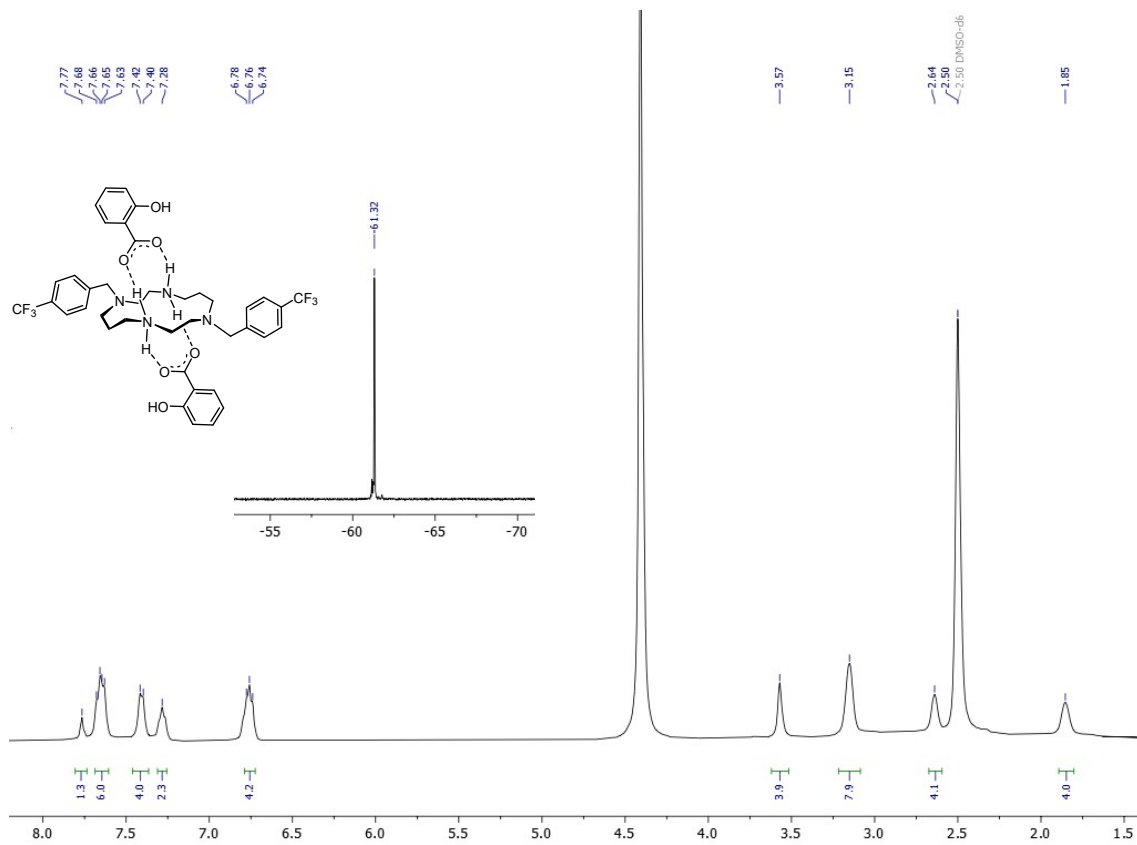

**Figure S8A:** <sup>1</sup>H and <sup>19</sup>F NMR spectra of **6** in D<sub>2</sub>O/(CD<sub>3</sub>)<sub>2</sub>SO.

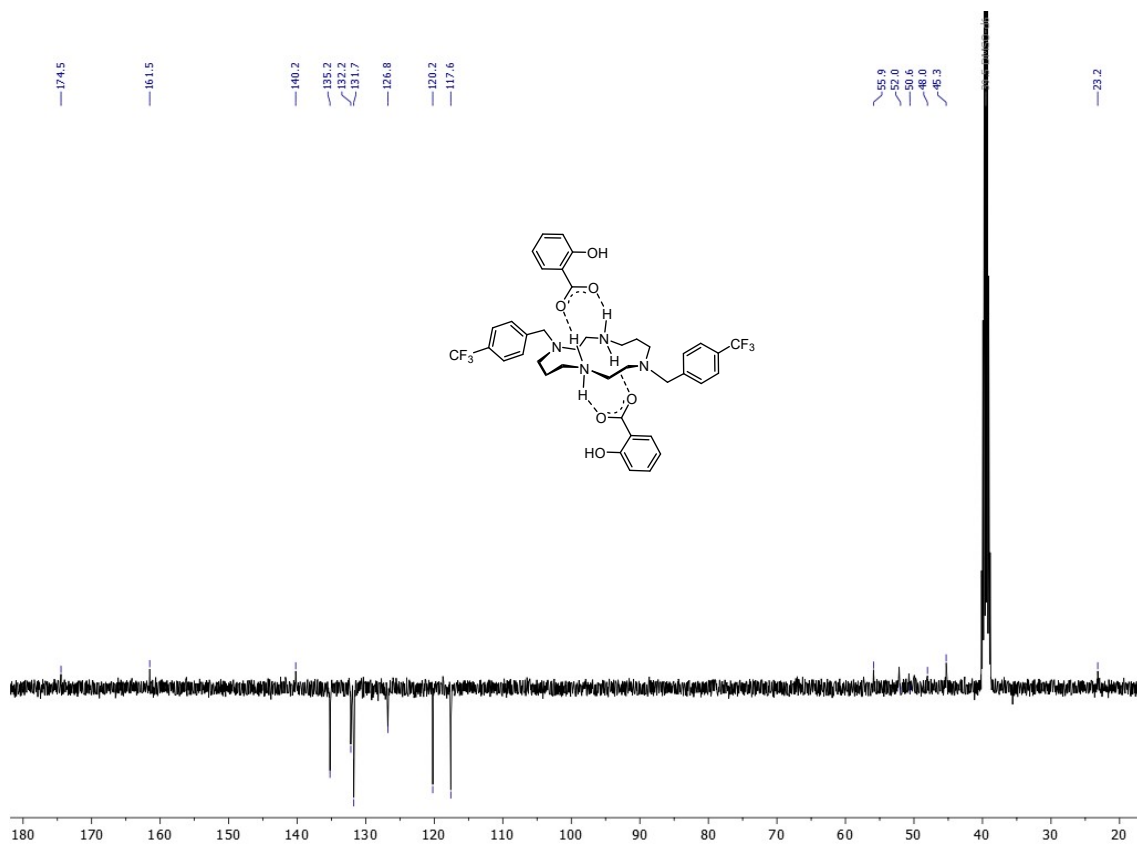

**Figure S8B:** <sup>13</sup>C{<sup>1</sup>H} NMR spectrum of **6** in D<sub>2</sub>O/(CD<sub>3</sub>)<sub>2</sub>SO.

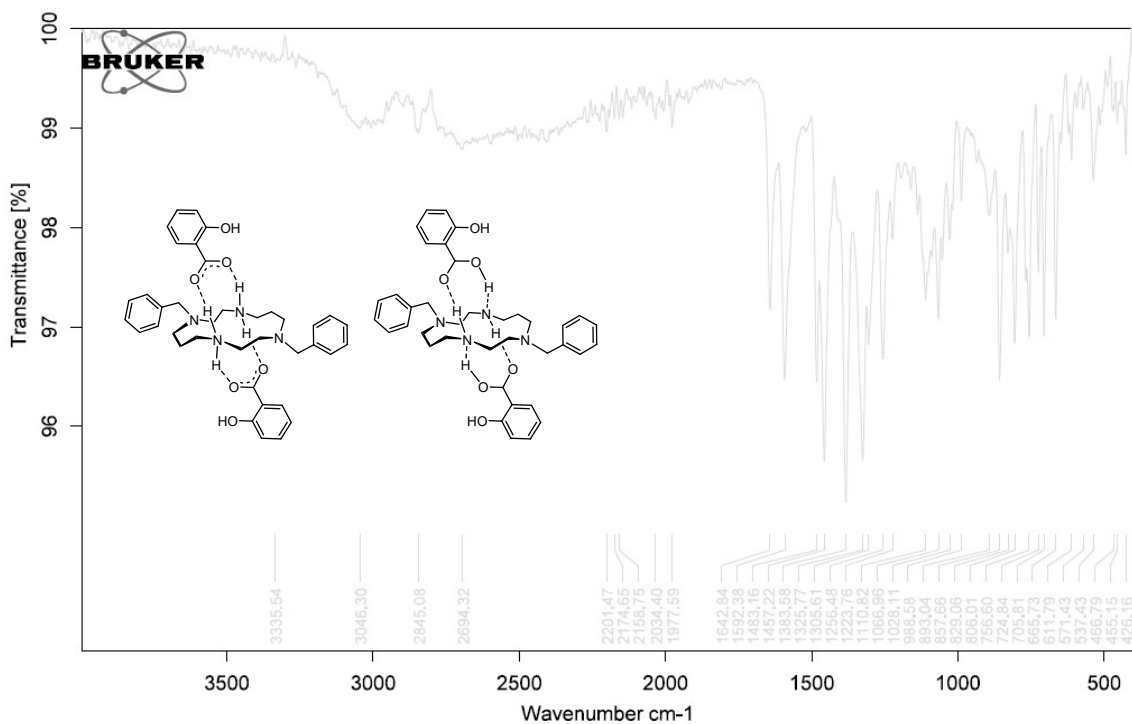

Figure S9: FT-IR spectra of 5.

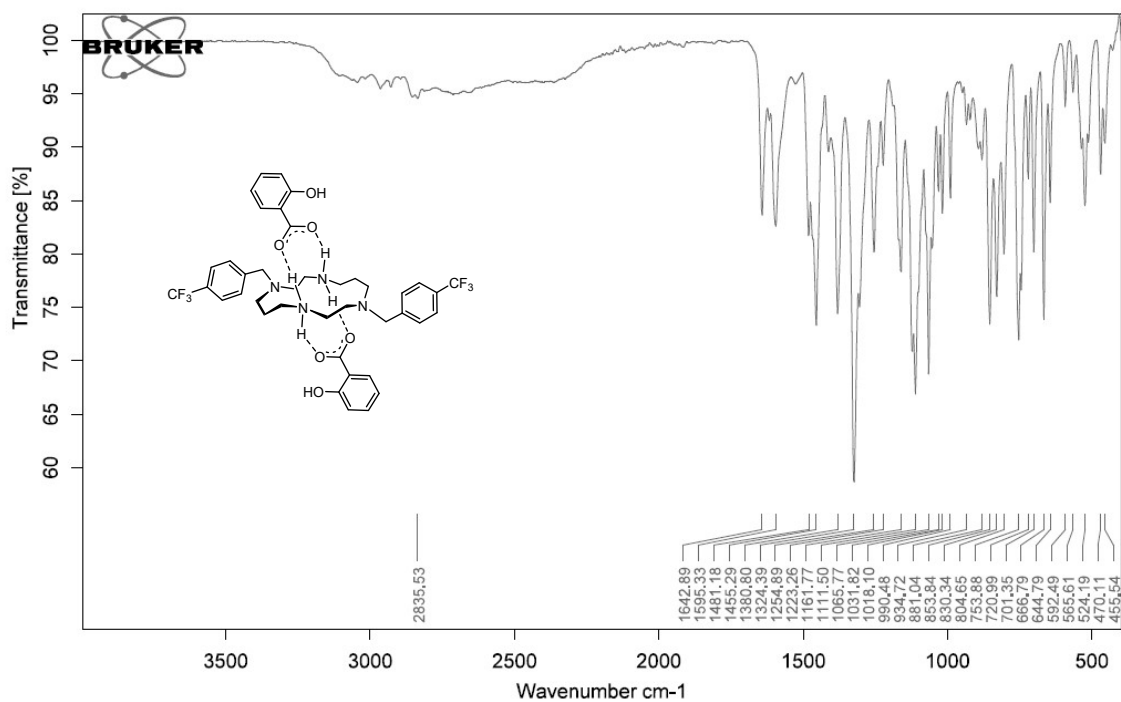

Figure S10: FT-IR spectra of 6.



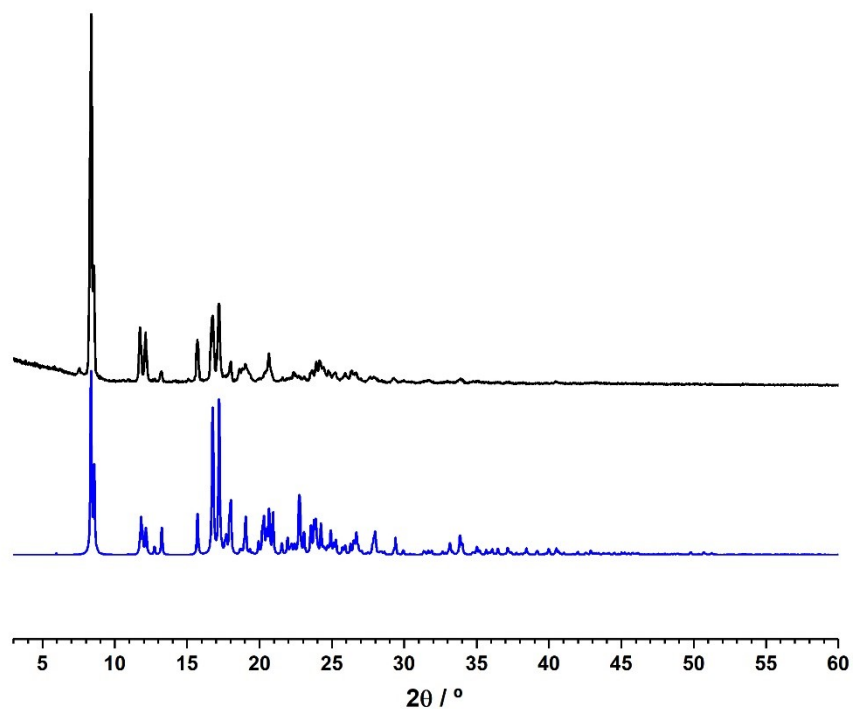

**Figure S11:** Experimental (black) and theoretical (blue) PXR D patterns of **5**.

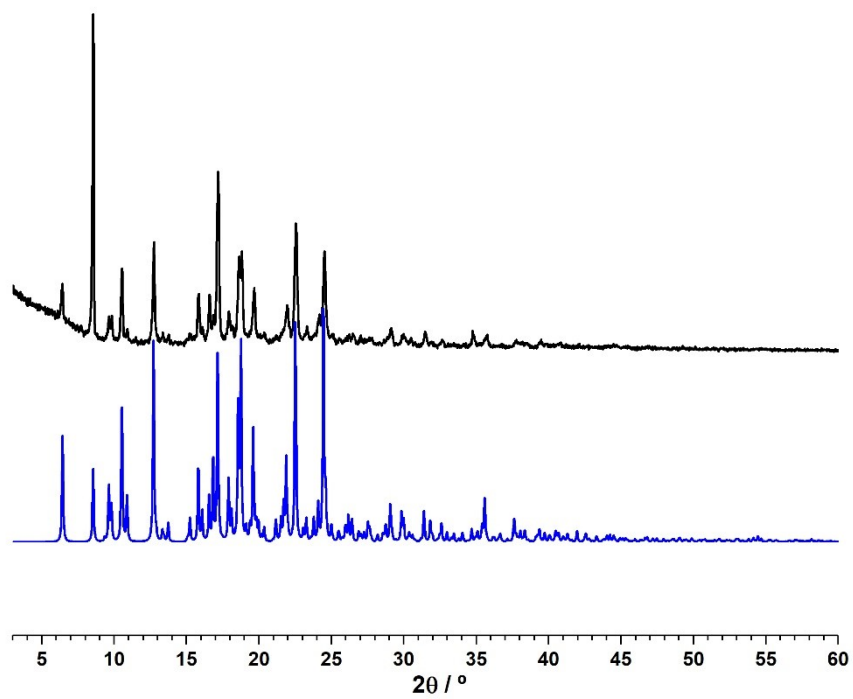

**Figure S12:** Experimental (black) and theoretical (blue) PXR D patterns of **6**.

2) Hydrogen bond details for compounds 3-6

**Table S1:** List of the main hydrogen bonds found for 3

| Sym. Op.            | D–H···A                                           | <i>d</i> (D–H) (Å) | <i>d</i> (H···A) (Å) | <i>d</i> (D···A) (Å) | (DHA) (°) |
|---------------------|---------------------------------------------------|--------------------|----------------------|----------------------|-----------|
| <i>x, y, z</i>      | N <sub>2</sub> –H <sub>1N</sub> ···O <sub>1</sub> | 0.91(3)            | 2.01(3)              | 2.853(3)             | 154(3)    |
| <i>x, y, z</i>      | N <sub>2</sub> –H <sub>1N</sub> ···O <sub>2</sub> | 0.91(3)            | 2.42(3)              | 3.151(3)             | 137(3)    |
| <i>1-x, -y, 1-z</i> | N <sub>2</sub> –H <sub>2N</sub> ···O <sub>2</sub> | 0.83(3)            | 2.00(3)              | 2.766(3)             | 152(3)    |
| <i>x, y, z</i>      | N <sub>3</sub> –H <sub>3N</sub> ···O <sub>1</sub> | 0.95(4)            | 1.86(3)              | 2.652(3)             | 140(3)    |
| <i>x, y, z</i>      | N <sub>5</sub> –H <sub>4N</sub> ···O <sub>4</sub> | 0.93(3)            | 1.85(3)              | 2.752(3)             | 163(3)    |
| <i>2-x, -y, 1-z</i> | N <sub>5</sub> –H <sub>5N</sub> ···O <sub>3</sub> | 0.90(3)            | 1.93(3)              | 2.759(3)             | 151(2)    |
| <i>x, y, z</i>      | N <sub>6</sub> –H <sub>6N</sub> ···O <sub>4</sub> | 0.85(4)            | 1.92(4)              | 2.617(4)             | 138(3)    |

**Table S2:** List of the main hydrogen bonds found for 4

| Sym. Op.             | D–H···A                                           | <i>d</i> (D–H)<br>(Å) | <i>d</i> (H···A)<br>(Å) | <i>d</i> (D···A)<br>(Å) | (DHA)<br>(°) |
|----------------------|---------------------------------------------------|-----------------------|-------------------------|-------------------------|--------------|
| <i>-x, 1-y, 1-z</i>  | N <sub>2</sub> –H <sub>1N</sub> ···N <sub>1</sub> | 0.91(3)               | 2.54(3)                 | 3.013(4)                | 113(3)       |
| <i>½-x, ½-y, 1-z</i> | N <sub>2</sub> –H <sub>1N</sub> ···O <sub>2</sub> | 0.91(3)               | 1.99(4)                 | 2.766(5)                | 143(3)       |
| <i>-½+x, ½+y, z</i>  | N <sub>2</sub> –H <sub>2N</sub> ···O <sub>1</sub> | 0.93(4)               | 1.84(4)                 | 2.754(5)                | 169(4)       |
| <i>-½+x, ½+y, z</i>  | N <sub>2</sub> –H <sub>2N</sub> ···O <sub>2</sub> | 0.93(4)               | 2.54(4)                 | 3.223(5)                | 131(3)       |
| <i>x, y, z</i>       | N <sub>3</sub> –H <sub>3N</sub> ···O <sub>1</sub> | 0.76(4)               | 2.01(4)                 | 2.653(5)                | 143(4)       |

**Table S3:** List of the main hydrogen bonds found for compound (5)

| Sym. Op.       | D–H···A                                           | $d(\text{D–H})$ (Å) | $d(\text{H···A})$ (Å) | $d(\text{D···A})$ (Å) | (DHA) (°) |
|----------------|---------------------------------------------------|---------------------|-----------------------|-----------------------|-----------|
| $x, y, z$      | O <sub>1</sub> –H <sub>10</sub> ···O <sub>3</sub> | 0.82                | 1.81                  | 2.531(7)              | 145       |
| $1-x, 2-y, -z$ | N <sub>2</sub> –H <sub>1N</sub> ···O <sub>2</sub> | 0.92(5)             | 1.82(5)               | 2.741(5)              | 162(4)    |
| $1-x, -y, 1-z$ | N <sub>4</sub> –H <sub>2N</sub> ···O <sub>6</sub> | 0.73(5)             | 2.14(4)               | 2.807(6)              | 153(4)    |
| $x, y, z$      | O <sub>3</sub> –H <sub>30</sub> ···N <sub>2</sub> | 0.82                | 1.99                  | 2.799(6)              | 169       |
| $x, y, z$      | N <sub>4</sub> –H <sub>3N</sub> ···O <sub>5</sub> | 0.91(7)             | 1.89(6)               | 2.746(6)              | 157(6)    |
| $x, y, z$      | O <sub>4</sub> –H <sub>40</sub> ···O <sub>5</sub> | 0.82                | 1.77                  | 2.497(5)              | 147       |

**Table S4:** List of the main hydrogen bonds found for compound 6

| Sym. Op.  | D–H···A                                           | $d(\text{D–H})$ (Å) | $d(\text{H···A})$ (Å) | $d(\text{D···A})$ (Å) | (DHA) (°) |
|-----------|---------------------------------------------------|---------------------|-----------------------|-----------------------|-----------|
| $x, y, z$ | N <sub>2</sub> –H <sub>1N</sub> ···O <sub>2</sub> | 0.97(4)             | 1.92(3)               | 2.876(4)              | 166(3)    |
| $x, y, z$ | N <sub>2</sub> –H <sub>1N</sub> ···O <sub>3</sub> | 0.97(4)             | 2.52(4)               | 3.179(3)              | 125(2)    |
| $x, y, z$ | O <sub>1</sub> –H <sub>10</sub> ···O <sub>2</sub> | 0.82                | 1.83                  | 2.558(3)              | 147       |
| $x, y, z$ | N <sub>2</sub> –H <sub>2N</sub> ···O <sub>6</sub> | 0.89(4)             | 2.07(3)               | 2.824(4)              | 143(3)    |
| $x, y, z$ | N <sub>2</sub> –H <sub>2N</sub> ···N <sub>3</sub> | 0.89(3)             | 2.53(3)               | 3.051(3)              | 118(2)    |
| $x, y, z$ | N <sub>4</sub> –H <sub>3N</sub> ···O <sub>3</sub> | 0.88(3)             | 2.09(3)               | 2.845(4)              | 143(3)    |
| $x, y, z$ | N <sub>4</sub> –H <sub>3N</sub> ···N <sub>1</sub> | 0.88(3)             | 2.59(3)               | 3.071(4)              | 115(3)    |
| $x, y, z$ | N <sub>4</sub> –H <sub>4N</sub> ···O <sub>5</sub> | 0.91(3)             | 1.89(3)               | 2.792(4)              | 169(3)    |
| $x, y, z$ | O <sub>4</sub> –H <sub>40</sub> ···O <sub>5</sub> | 0.82                | 1.83                  | 2.557(3)              | 147       |

### 3) Antimicrobial activity

**Table S5:** Minimum inhibitory concentration values (MIC,  $\mu\text{g/mL}$ ) of compounds 1-6, flufenamic acid (FA) as well as positive and negative controls *Candida albicans* and *Saccharomyces cerevisiae* (yeasts), *Escherichia coli* and *Pseudomonas aeruginosa* (Gram-negative bacteria) and *Staphylococcus aureus*, *Enterococcus faecalis* and *Mycobacterium smegmatis* (Gram-positive bacteria) after 24h for bacteria and after 48h for yeasts.

| Microorganisms                                                                                                                                                       |                       | FA      | 1     | 2     | 3     | 4     | 5     | 6     | Positive control | Negative control |
|----------------------------------------------------------------------------------------------------------------------------------------------------------------------|-----------------------|---------|-------|-------|-------|-------|-------|-------|------------------|------------------|
| Gram-<br>positive<br>Bacteria                                                                                                                                        | <i>M. smegmatis</i>   | >125.00 | 31.25 | <0.49 | 40.63 | <0.49 | 32.50 | 0.98  | <0.49 (Van)      | 125.00           |
|                                                                                                                                                                      | <i>E. faecalis</i>    | 62.50   | 10.00 | 3.91  | 5.44  | 7.81  | 32.50 | 7.81  | <0.49 (Van)      | 125.00           |
|                                                                                                                                                                      | <i>S. aureus</i>      | 62.50   | 10.00 | 7.81  | 10.88 | 7.81  | 62.00 | 7.81  | 3.91 (Van)       | 125.00           |
|                                                                                                                                                                      | <i>S. aureus</i> MRSA | 5.86    | 36.25 | 3.91  | 40.63 | 7.81  | 32.50 | 7.81  | 0.98 (Van)       | 125.00           |
| Gram-<br>negative<br>Bacteria                                                                                                                                        | <i>P. aeruginosa</i>  | 31.25   | 16.88 | 7.81  | 3.22  | 7.81  | 8.13  | 15.63 | <0.49 (Nor)      | 62.50            |
|                                                                                                                                                                      | <i>E. coli</i>        | >62.50  | 6.41  | 7.81  | 5.26  | 7.81  | 8.13  | 7.81  | <0.49 (Nor)      | 62.50            |
| Yeasts                                                                                                                                                               | <i>S. cerevisiae</i>  | >62.50  | 10.00 | 15.63 | 5.44  | 15.63 | 16.25 | 31.25 | 15.63 (Nys)      | 62.50            |
|                                                                                                                                                                      | <i>C. albicans</i>    | 62.50   | 5.00  | 15.63 | 5.44  | 31.25 | 16.25 | 62.50 | 7.81<br>(Nys)    | 125.00           |
| Positive controls: Nys – nystatin; Nor – norfloxacin; Van – vancomycin. Negative control: DMSO.                                                                      |                       |         |       |       |       |       |       |       |                  |                  |
| Note: The antimicrobial effect activity of flufenamic acid (FA) is limited by the effect of DMSO for <i>M. smegmatis</i> , <i>E. coli</i> and <i>S. cerevisiae</i> . |                       |         |       |       |       |       |       |       |                  |                  |
